# Supplementary material for: Hydrophobically-enhanced “on water” cycloaddition of CO2to long-chain terminal epoxides
Source: Royal Society of Chemistry journal article supplement (doi:10.1039/d2cc04526e), 2022-01-01
Supplement: d2cc04526e1.pdf [file d2cc04526e1.pdf]

## Electronic Supplementary Information

### Hydrophobically-enhanced “on water” cycloaddition of CO<sub>2</sub> to long-chain terminal epoxides

Wimalin Jaroonwatana,<sup>a</sup> Valerio D’Elia\*<sup>a</sup>, and Daniel Crespy\*<sup>a</sup>

<sup>a</sup> Department of Material Science and Engineering, School of Molecular Science and Engineering, Vidyasirimedhi Institute of Science and Technology (VISTEC), Payupnai, WangChan, Rayong 21210, Thailand

\* Corresponding author

E-mail address: [valerio.delia@vistec.ac.th](mailto:valerio.delia@vistec.ac.th) (V. D’Elia), [daniel.crespy@vistec.ac.th](mailto:daniel.crespy@vistec.ac.th) (D. Crespy).

## Experimental Section

### Materials

1,2-Epoxydodecane (> 95%, TCI), 1,2-epoxydecane (> 97%, TCI), 1,2-epoxyoctane (> 96%, TCI), 1,2-epoxy-9-decene (> 96%, TCI), glycidyl hexadecyl ether ( $\geq$  79.5%, Sigma Aldrich), tetrabutylammonium iodide (TBAI, > 98%, TCI), tetrabutylammonium chloride (TBAC,  $\geq$  97.0%, Merck), tetrabutylammonium bromide (TBAB, > 99%, Acros Organics), triethylamine (Et<sub>3</sub>N, 99%, Merck), *N,N*-dimethyldodecylamine (DDA, > 96%, TCI), *n*-hexadecane (HD, 99%, Acros Organics), *n*-octane (> 98.5%, Carlo Erba), dichloromethane (DCM, 99%, Chemex), ethyl alcohol (EtOH, > 99%, Duksan), ethyl acetate (EtOAc, 99%), *n*-hexane (99%, Chemex), *N,N*-dimethylformamide extra dry (DMF, 99.8%, Acros Organics), diethyl ether (Et<sub>2</sub>O, 99.5%, Qrec), sodium dodecyl sulfate (SDS, 99%, Acros Organics), chloroform-d<sub>1</sub> (CDCl<sub>3</sub>, 99.8%, CIL), hexadecylamine (> 95%, TCI), iodomethane stabilized with silver (99%, Merck), and *N,N*-dimethylacetamide dimethyl acetal stabilized with 5-10% methanol (> 90%, TCI) were used as received. Deionized water was used throughout the research work.

### Synthesis of hexadecyltrimethylammonium iodide

Hexadecyltrimethylammonium iodide (CTAI) was synthesized according to a previous report [67]. hexadecylamine (1g, 4.14 mmol) was dissolved in 6.8 mL of DMF and iodomethane (0.77 mL, 12.42 mmol) was added to this solution, followed by stirring at 25 °C for 12 h. Then, the reaction mixture was diluted with Et<sub>2</sub>O and stirred for 30 min. The mixture was filtrated, washed with Et<sub>2</sub>O and then dried at 45 °C under vacuum for 24 h to yield a white product (405 mg, 24% yield). <sup>1</sup>H NMR spectroscopy (CDCl<sub>3</sub>, 600 MHz):  $\delta$  3.61 – 3.36 (m, 11H), 1.85 – 1.70 (m, 2H), 1.45 – 1.20 (m, 26H), and 0.88 ppm (t, *J* = 7.0 Hz, 3H).

## Synthesis of cyclic carbonates in emulsion

In general, epoxide (1.63 mmol), TBAI (3 mol% relative to the epoxide), and *N,N*-dimethyl dodecylamine (8.9 mM in water) were mixed in a 50 mL sealed centrifugal tube and bubbled with a rubber balloon containing ~ 2 L of CO<sub>2</sub> under ice-cooling for 15 min to ensure that the DDA formed a carbonate. Unless otherwise stated, the ratio between epoxide and water was 0.125 w/w. Then, the mixture was sonicated under ice-cooling in a pulse regime (3 s on, 1 s off) at 50% amplitude for 4 min (Hielscher Ultrasonic Processor UP200St) to form a miniemulsion and transferred to a 50 mL one-neck round bottom flask. The round bottom flask was sealed, and CO<sub>2</sub> was added to the reaction mixture by inserting a long needle connecting with the CO<sub>2</sub> rubber balloon. Part of CO<sub>2</sub> was used to flush the flask to displace air through a second needle before the reaction. The reaction vessel was heated at 60 °C and stirred at 700 rpm for 24 h. Afterwards, the reaction mixture was placed in a separatory funnel and extracted 4 times with 25 mL of dichloromethane. The organic layer was then placed into a 50 mL one-neck round bottom flask and the crude product was obtained by evaporation of solvents with a rotary evaporator. An aliquot of the crude product after evaporation was taken for determining for conversion and selectivity by <sup>1</sup>H NMR spectroscopy. All reactions were conducted at least in duplicate. The products were purified by column chromatography (*n*-hexane:ethyl acetate = 5:1 except for 1,2-epoxydodecane for which we used 9:1 ratio). The cyclic carbonate products (**2a-2d**) were isolated as colorless liquids.

## Emulsion preparation for synthesis of 4-((hexadecyloxy)methyl)-1,3-dioxolan-2-one

For the synthesis of 4-((hexadecyloxy)methyl)-1,3-dioxolan-2-one (**2e**), a slightly modified procedure was employed: Glycidyl hexadecyl ether (486 mg, 1.63 mmol), TBAI (18 mg, 3 mol% relative to the epoxide), *N,N*-dimethyl dodecylamine (7.39 mg, 8.9 mM in aqueous solution), and water were mixed in a 50 mL one-neck round bottom flask at 60 °C for 5 min. The reaction was conducted at 60 °C for 18 h. The emulsion was then transferred to a separating funnel, and isolated by adding 2 mL of brine and extracted four times with 20 mL of ethyl acetate. Finally, the crude product was concentrated by evaporation of solvent with a rotary evaporator. A sample of 50 mg of the crude reaction mixture dissolved in 750  $\mu$ L CDCl<sub>3</sub> was used to determine the conversion and selectivity of the reaction by <sup>1</sup>H-NMR spectroscopy. The crude product was then mixed with silica gel in acetone/dichloromethane (1:9) at a stirring speed of 400 rpm for 3 h. Afterwards, the product was passed through filter paper by using dichloromethane as the mobile phase and the carbonate was obtained as white solid after removing the solvent by rotary evaporation.

### **Upscaling of 4-hexyl-1,3-dioxolan-2-one synthesis by CO<sub>2</sub> cycloaddition reaction**

The reaction was upscaled 25 times according to the aforementioned procedure. The product was purified via column chromatography (*n*-hexane : ethyl acetate = 20:1 to 5:1) according to a previous report [68]. The carbonated product (**2c**) was isolated as colorless liquid (5.95 g, 85% yield).

### **Analytical tools**

<sup>1</sup>H NMR spectra were recorded with a nuclear magnetic resonance spectrometer (600 MHz, Avance III HD, Bruker) at 299 K and the spectra were analyzed with the Bruker Topspin 4.0.7 software. All experiments were repeated two times and averaged. 50  $\mu$ L of the emulsions were

diluted in 2 mL water in a quartz cuvette for measuring the hydrodynamic diameter of the droplets by dynamic light scattering (DLS, NanoPlus-3, Micromeritics) with a laser wavelength of 660 nm and a detection angle at 165°. Fourier transform infrared spectra of crude products were recorded on a PerkinElmer Frontier spectrometer with the attenuated total reflection mode at a resolution of 4 cm<sup>-1</sup> over wavenumbers from 4000 to 400 cm<sup>-1</sup>. Interfacial tension was measured with a spinning drop tensiometer (SIT2000B model, LabGeni). 500 µL of a mixture containing 4-hexyl-1,3-dioxolan-2-one, 1,2-epoxyoctane and water (0.125 w/w oil/water) were injected in a glass tube placed in a horizontal position and subsequently rotated at an angular velocity of 5000 rpm at 25 °C. The ratios between 4-hexyl-1,3-dioxolan-2-one and 1,2-epoxyoctane were 0:0.2, 23:177, 4:16, 115:85 and 195:5.0:0.2, 23:177, 4:16, 115:85 and 195:5 w:w. The interfacial tension  $\gamma$  was calculated from the drop radius  $r$  perpendicular to the axis of rotation, the angular frequency of the rotation  $\omega$ , and the density difference between the two phases  $\Delta\rho$  following the equation:  $\gamma = (r^3 \omega^2 \Delta\rho) / 4$ . Experiments were performed in triplicates.

### Determination of the conversion

The conversion of long-chain alkyl epoxides **1a-1e** was determined from <sup>1</sup>H NMR spectroscopy measurements from the ratio of the integrals of OCH<sub>2</sub>CHR protons in the starting material (*Ha*), the carbonated product (*Hb*) and the diol product (*Hc*) according to **Equation S1** below and to the chemical shifts reported in **Table S1**.

**Equation S1.** Conversion as calculated from the intensities ( $I_H$ ) of the corresponding signals of OCH<sub>2</sub>CHR protons in the starting material (*Ha*), cyclic carbonate product (*Hb*) and diol by-product (*Hc*).

$$\text{Conversion (\%)} = \frac{I_{Hb} + I_{Hc}}{(I_{Ha} + I_{Hb} + I_{Hc})} \times 100 \quad \text{Eq. (S.1)}$$

**Scheme S1.** CO<sub>2</sub> conversion with epoxides into cyclic carbonates.

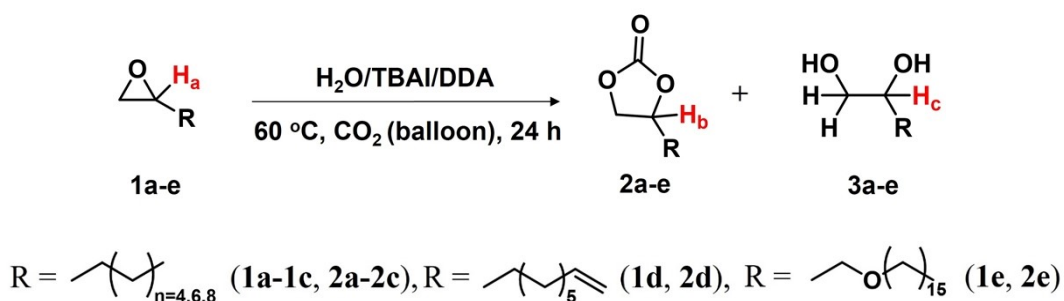

**Table S1.** Chemical shifts ( $\delta$ , ppm, CDCl<sub>3</sub>) for the corresponding OCH<sub>2</sub>CHR protons in the epoxides, cyclic carbonate products and diol by-product. See also the <sup>1</sup>H NMR spectra in the following section.

| Entry           | d Ha (ppm) | d Hb (ppm) | d Hc (ppm) |
|-----------------|------------|------------|------------|
| <b>1a/2a/3a</b> | 2.90       | 4.70       | 3.39       |
| <b>1b/2b/3b</b> | 2.90       | 4.69       | 3.48       |
| <b>1c/2c/3c</b> | 2.90       | 4.69       | 3.23       |
| <b>1d/2d/3d</b> | 2.90       | 4.97       | 3.23       |
| <b>1e/2e/3e</b> | 3.08       | 4.76       | 3.79       |

### Determination of the selectivity

The selectivity for the carbonate product was determined via <sup>1</sup>H NMR from the ratio of the integrals of the protons of carbonated product (*Hb*) and diol by-product (*Hc*) shown in Scheme S1 according to **Equation S2**. The selectivity was calculated from the integral values (I) of the RHCOCOOCH<sub>2</sub> protons in cyclic carbonate product (*Hb*) and RHC(OH)COHH<sub>2</sub> protons in diol by-product (*Hc*).

$$\text{Selectivity of cyclic carbonates (\%)} = \frac{I_{Hb}}{(I_{Hb} + I_{Hc})} \times 100 \quad \text{Eq. (S.2)}$$

### <sup>1</sup>H NMR of byproduct in crude products

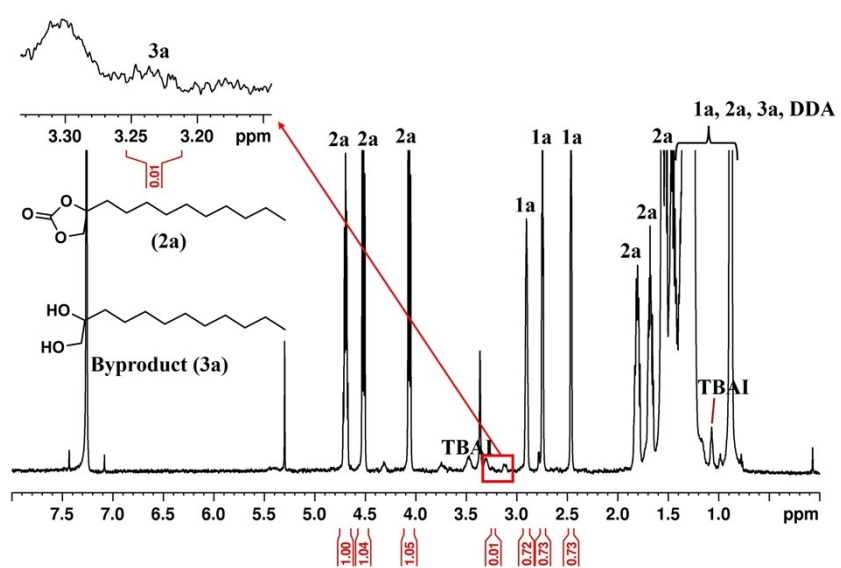

**Fig. S1.** Crude <sup>1</sup>H-NMR spectrum of **2b** obtained by cycloaddition of 1,2-epoxydodecane with CO<sub>2</sub> in miniemulsion for 15 h (CDCl<sub>3</sub>).

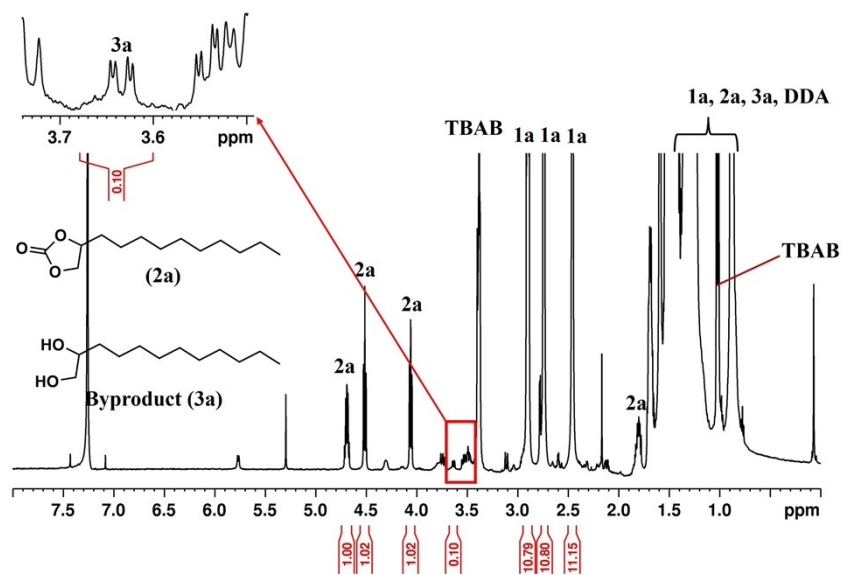

**Fig. S2.** Crude <sup>1</sup>H-NMR spectrum of **2b** obtained by cycloaddition of 1,2-epoxydodecane with CO<sub>2</sub> in miniemulsion using tetrabutylammonium bromide for 15 h (CDCl<sub>3</sub>).

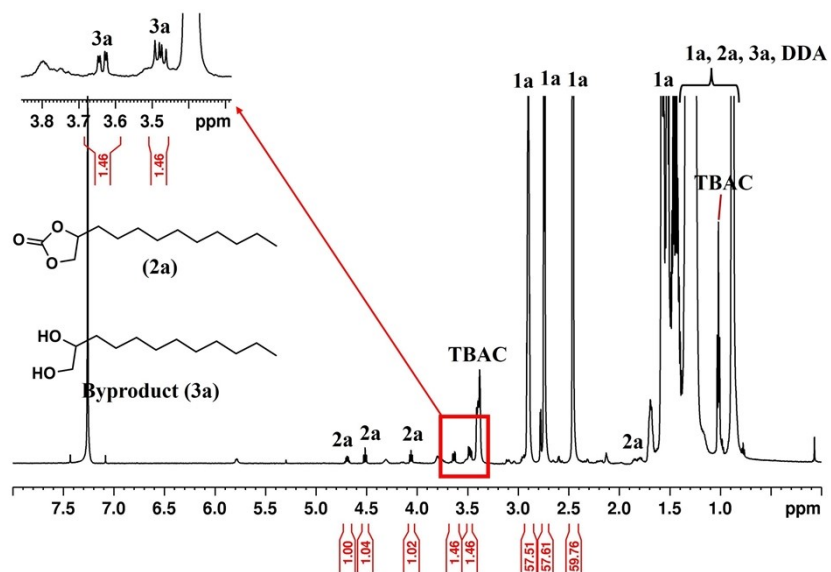

**Fig. S3.** Crude <sup>1</sup>H-NMR spectrum of **2b** obtained by cycloaddition of 1,2-epoxydodecane with CO<sub>2</sub> in miniemulsion using tetrabutylammonium chloride for 15 h (CDCl<sub>3</sub>).



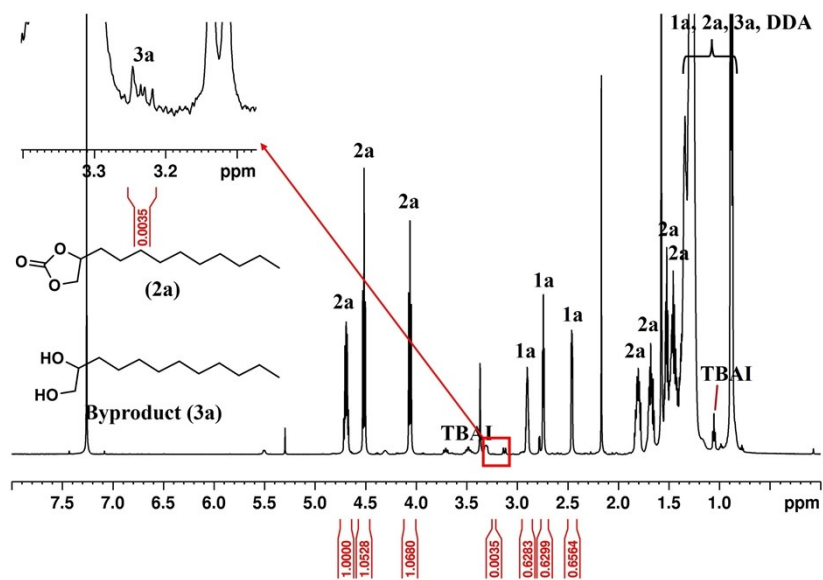

**Fig. S4.** Crude <sup>1</sup>H-NMR spectrum of **2b** obtained by cycloaddition of 1,2-epoxydodecane with CO<sub>2</sub> in miniemulsion at a stirring rate of 300 rpm for 15 h (CDCl<sub>3</sub>).

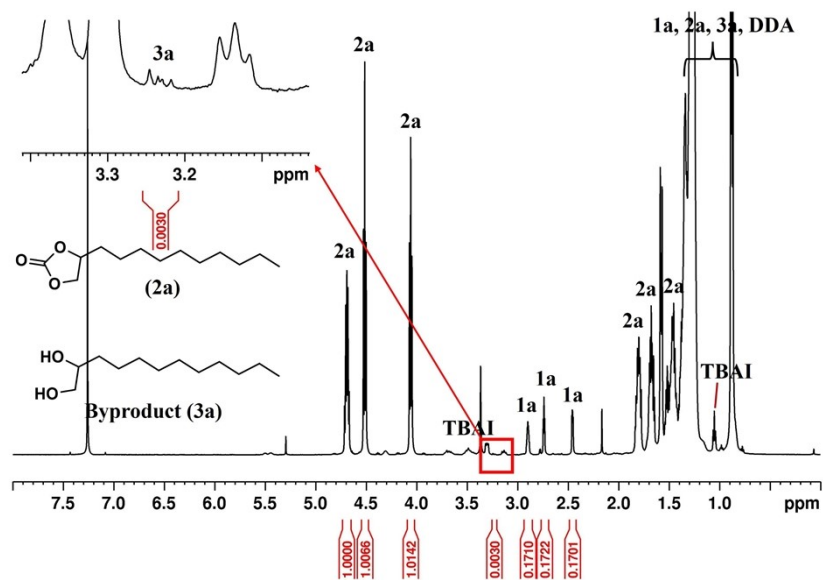

**Fig. S5.** Crude <sup>1</sup>H-NMR spectrum of **2b** obtained by cycloaddition of 1,2-epoxydodecane with CO<sub>2</sub> in miniemulsion at a stirring rate of 1000 rpm for 15 h (CDCl<sub>3</sub>).

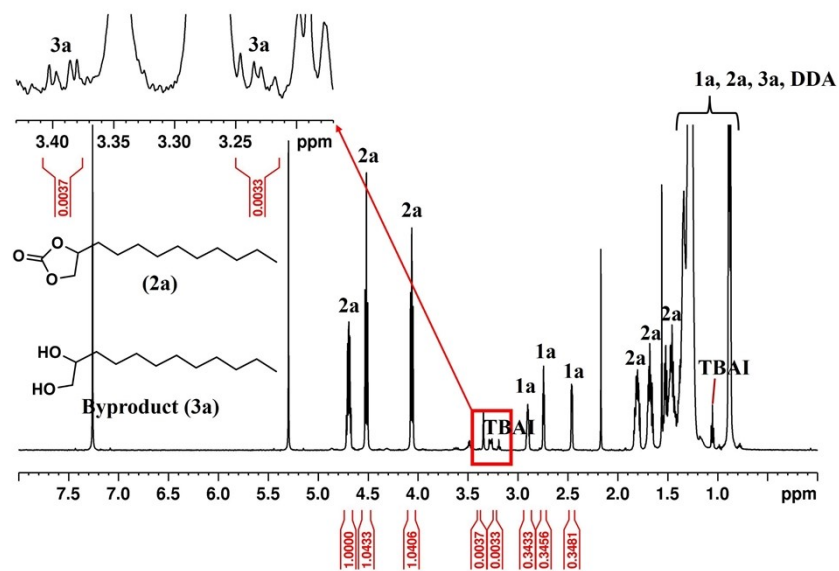

**Fig. S6.** Crude  $^1\text{H-NMR}$  spectrum of **2b** obtained by cycloaddition of 1,2-epoxydodecane with  $\text{CO}_2$  in miniemulsion using water/epoxide ratio to 4:1 (w/w) ( $\text{CDCl}_3$ ).

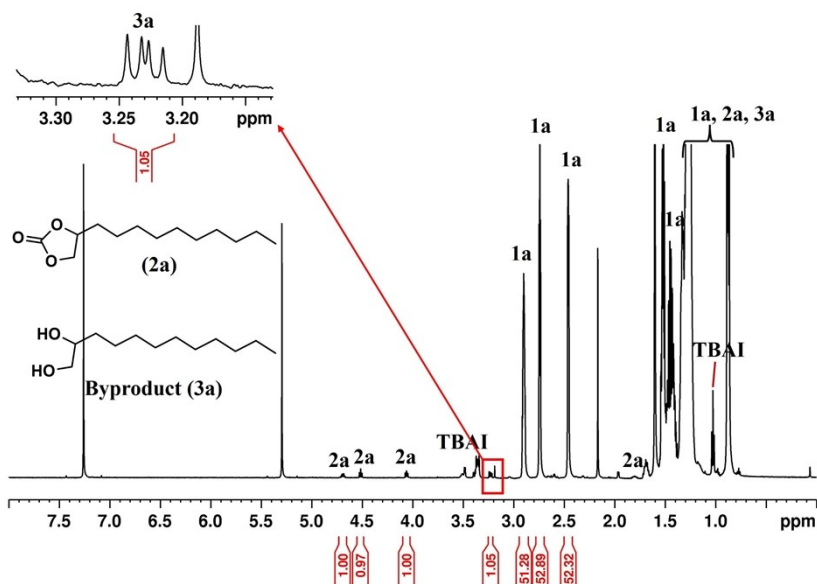

**Fig. S7.** Crude  $^1\text{H-NMR}$  spectrum of **2a** obtained by cycloaddition of 1,2-epoxydodecane with  $\text{CO}_2$  in non-emulsion ( $\text{CDCl}_3$ ).

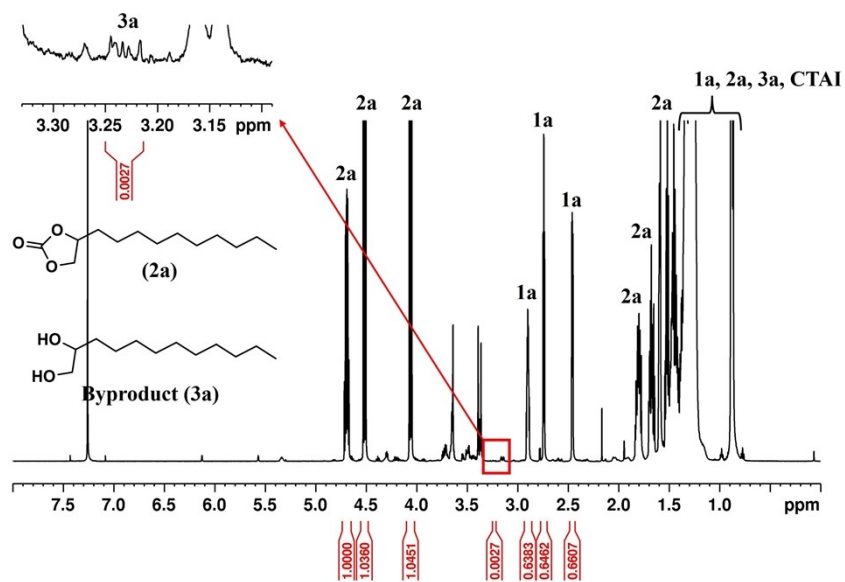

**Fig. S8.** Crude  $^1\text{H-NMR}$  spectrum of **2a** obtained by cycloaddition of 1,2-epoxydodecane with  $\text{CO}_2$  in miniemulsion using cetyltrimethylammonium iodide ( $\text{CDCl}_3$ ).

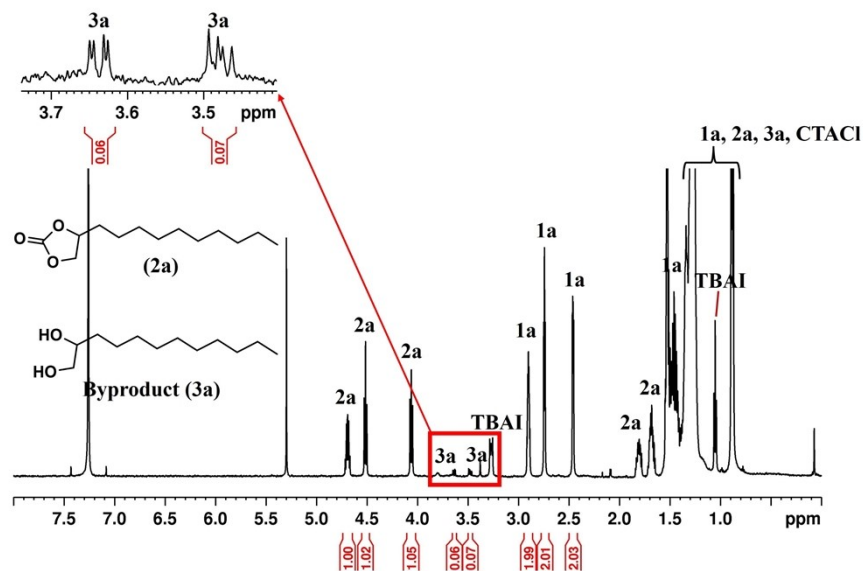

**Fig. S9.** Crude  $^1\text{H-NMR}$  spectrum of **2a** obtained by cycloaddition of 1,2-epoxydodecane with  $\text{CO}_2$  in miniemulsion using cetyltrimethylammonium chloride ( $\text{CDCl}_3$ ).



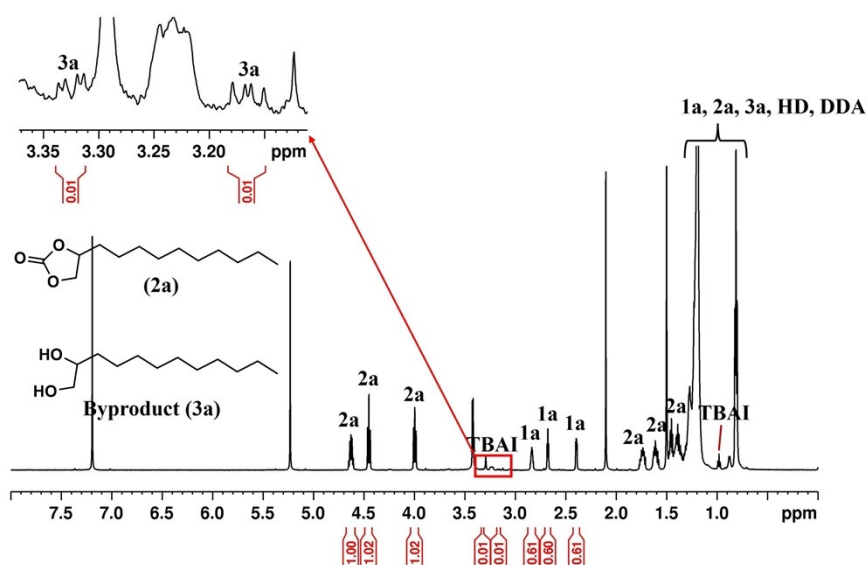

**Fig. S12.** Crude  $^1\text{H-NMR}$  spectrum of **2b** obtained by cycloaddition of 1,2-epoxydodecane with  $\text{CO}_2$  in miniemulsion using *n*-hexane ( $\text{CDCl}_3$ ).

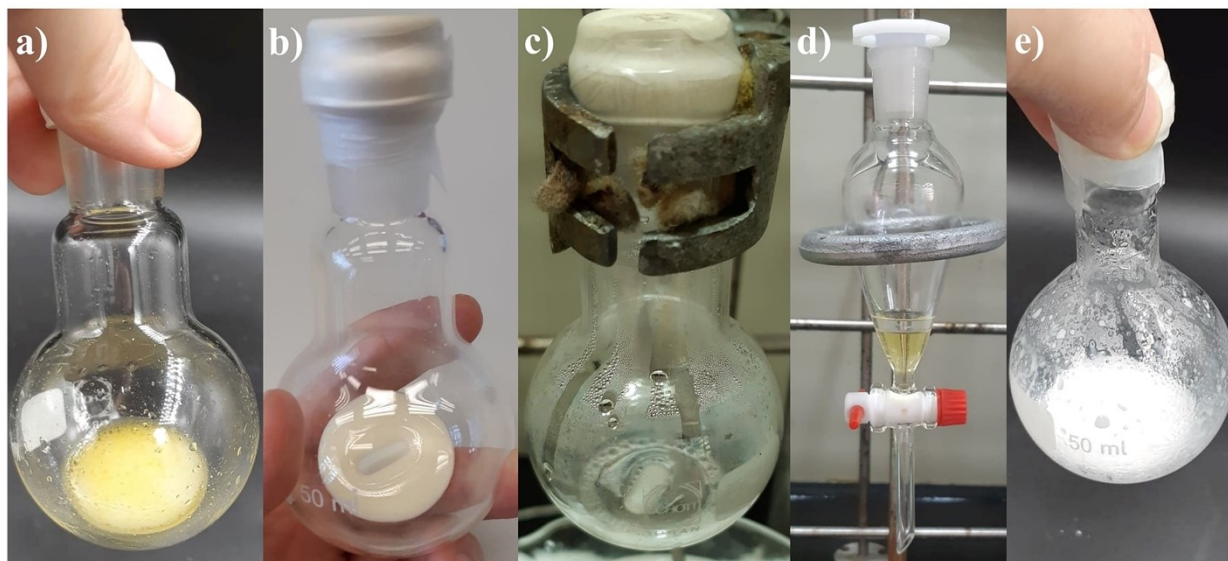

**Fig. S13.** Photographs of mixtures of the emulsion containing 1,2-epoxydodecane, TBAI, DDA, water and  $\text{CO}_2$  before ultrasonication (coarse emulsion) (a) and after ultrasonication before the reaction (b), and separated phases after the reaction was performed for 24 h (c). The crude product was extracted by adding dichloromethane (d). Photograph of the emulsion containing glycidyl hexadecyl ether TBAI, DDA and water after the reaction (e).

## <sup>1</sup>H NMR and IR spectra of crude products

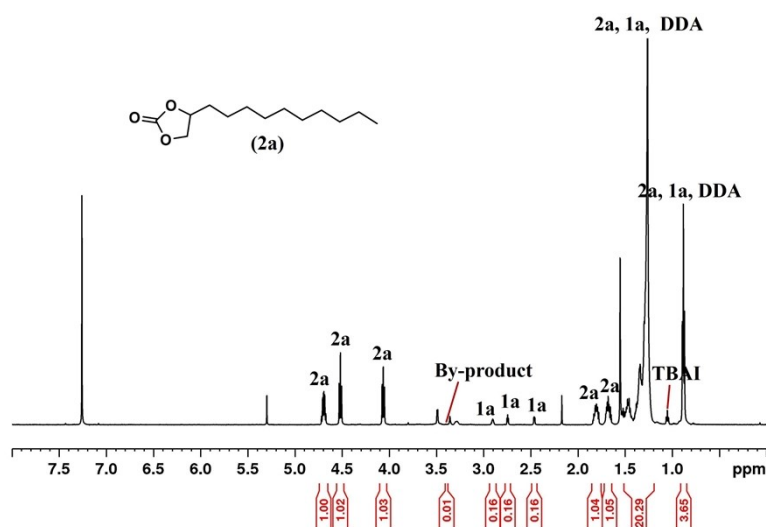

**Fig. S14.** Crude <sup>1</sup>H NMR spectrum of the reaction mixture containing 4-decyl-1,3-dioxolan-2-one (**2a**) obtained by cycloaddition of 1,2-epoxydodecane (**1a**) with CO<sub>2</sub> in miniemulsion [the signals of 1,2-dodecanediol are observed as impurity (by-product) and there is partial overlap

between the aliphatic **2a** side-chain protons, **1a** side-chain protons and the  $\text{NCH}_2\text{R}$  protons of DDA at 1.0-1.7 ppm] in  $\text{CDCl}_3$ .

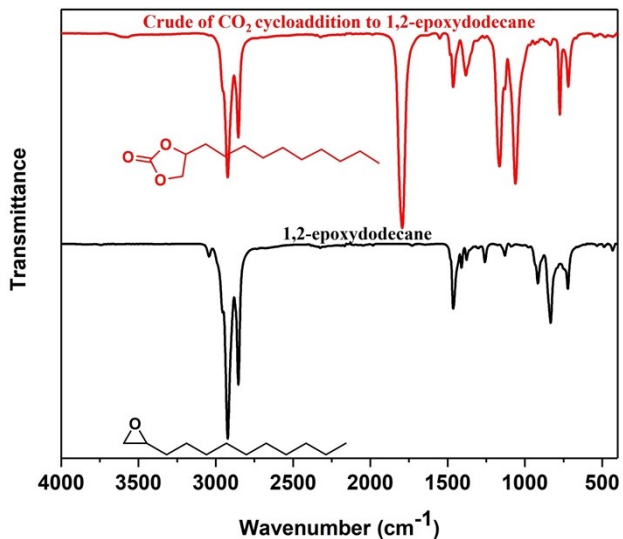

**Fig. S15.** FTIR spectra of crude product from CO<sub>2</sub> cycloaddition reaction to 1,2-epoxydodecane (**1a**) via miniemulsion.

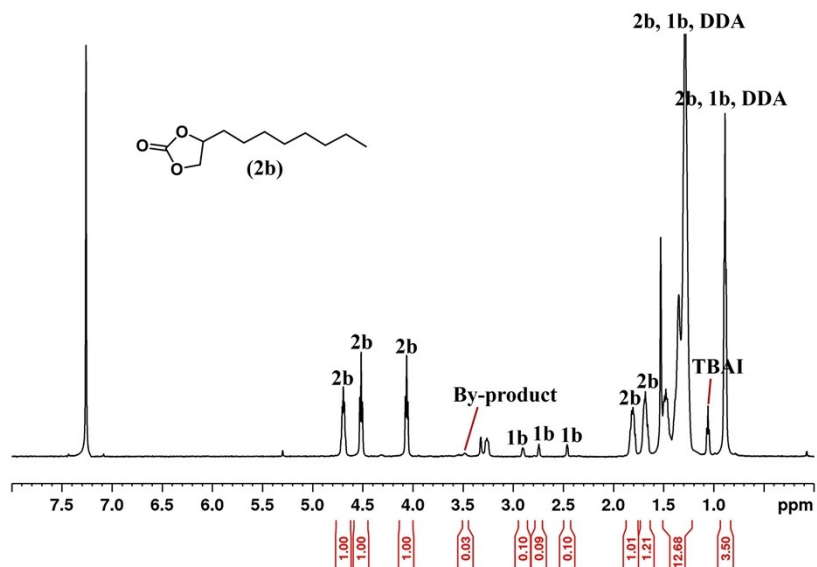

**Fig. S16.** Crude <sup>1</sup>H-NMR spectrum of **2b** obtained by cycloaddition of 1,2-epoxydodecane with CO<sub>2</sub> in miniemulsion ( $\text{CDCl}_3$ ).

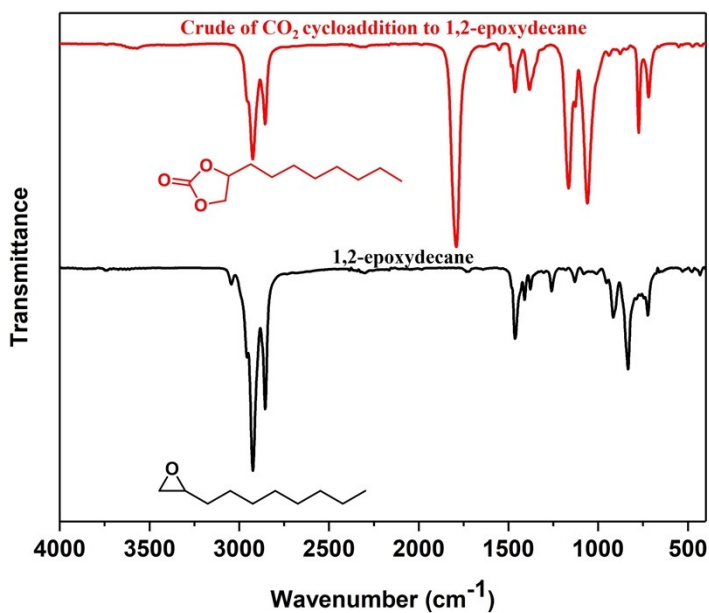

**Fig. S17.** FTIR spectra of crude product from CO<sub>2</sub> cycloaddition reaction to 1,2-epoxydecane (**1b**) via emulsion.

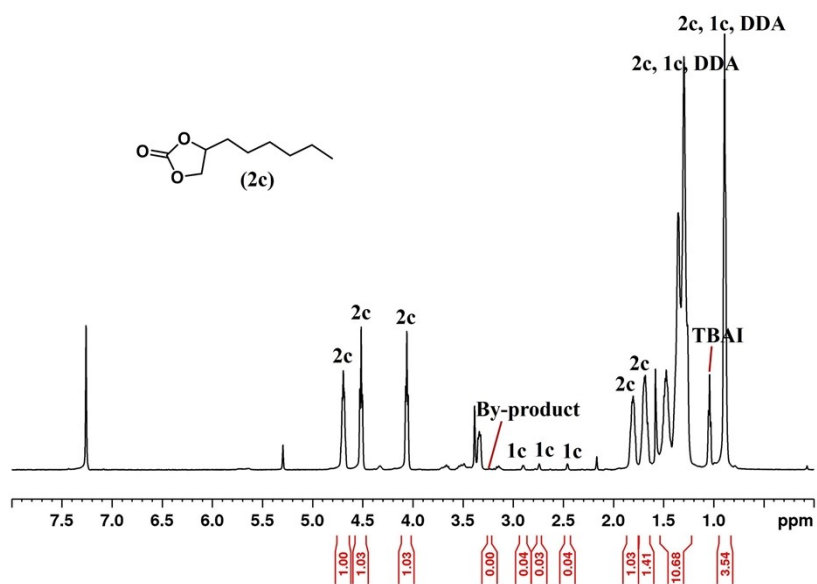

**Fig. S18.** Crude <sup>1</sup>H-NMR spectrum of **2c** obtained by cycloaddition of 1,2-epoxyoctane with CO<sub>2</sub> via miniemulsion (CDCl<sub>3</sub>).



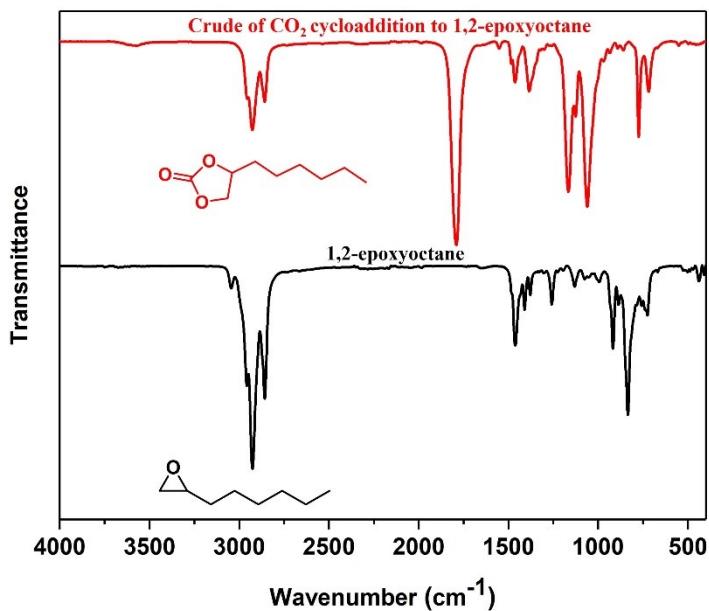

**Fig. S19.** FTIR spectra of crude product from CO<sub>2</sub> cycloaddition reaction to 1,2-epoxyoctane (**1c**) via emulsion.

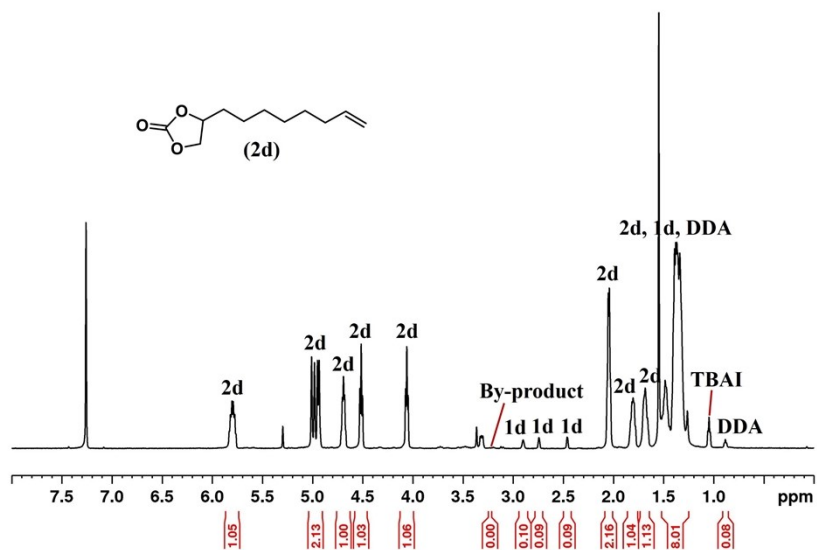

**Fig. S20.** Crude <sup>1</sup>H-NMR spectrum of **2d** obtained by cycloaddition of 1,2-epoxy-9-decene with CO<sub>2</sub> in miniemulsion (CDCl<sub>3</sub>).

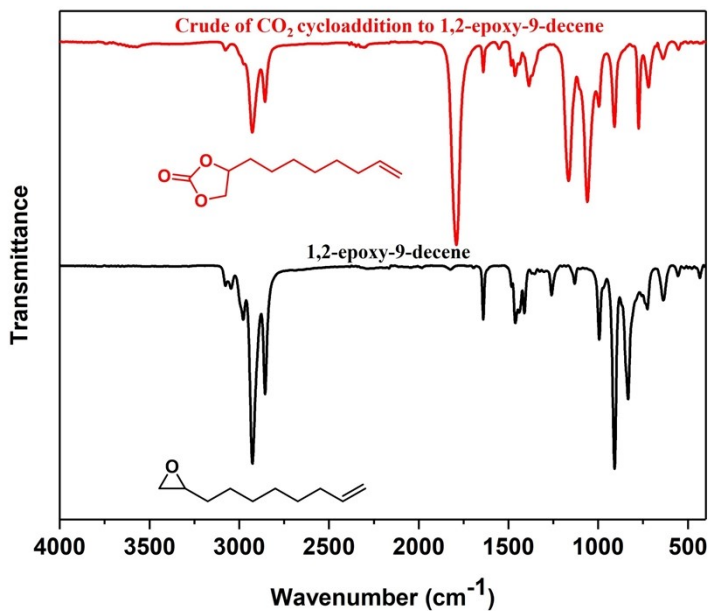

**Fig. S21.** FTIR spectra of crude product from CO<sub>2</sub> cycloaddition reaction to 1,2-epoxy-9-decene (**1d**) in miniemulsion.

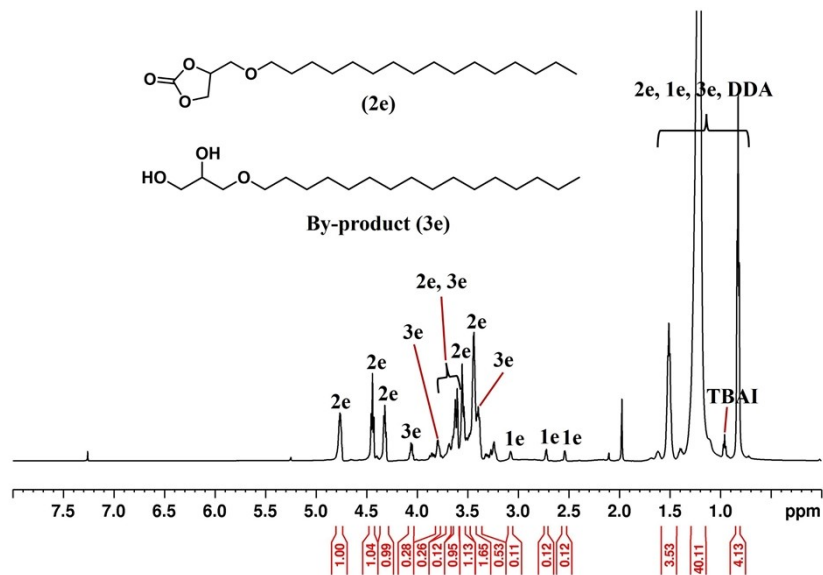

**Fig. S22.** <sup>1</sup>H-NMR spectrum of **2e** obtained by cycloaddition of glycidyl hexadecyl ether with CO<sub>2</sub> in miniemulsion (CDCl<sub>3</sub>).

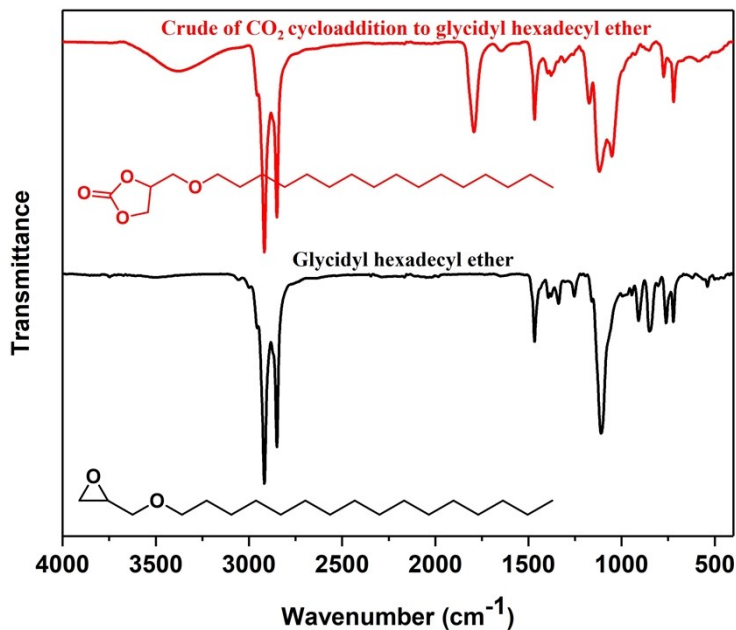

**Fig. S23.** FTIR spectra of crude product from CO<sub>2</sub> cycloaddition reaction to glycidyl hexadecyl ether (**1e**) in minemulsion.

### <sup>1</sup>H NMR and <sup>13</sup>C NMR spectra of products

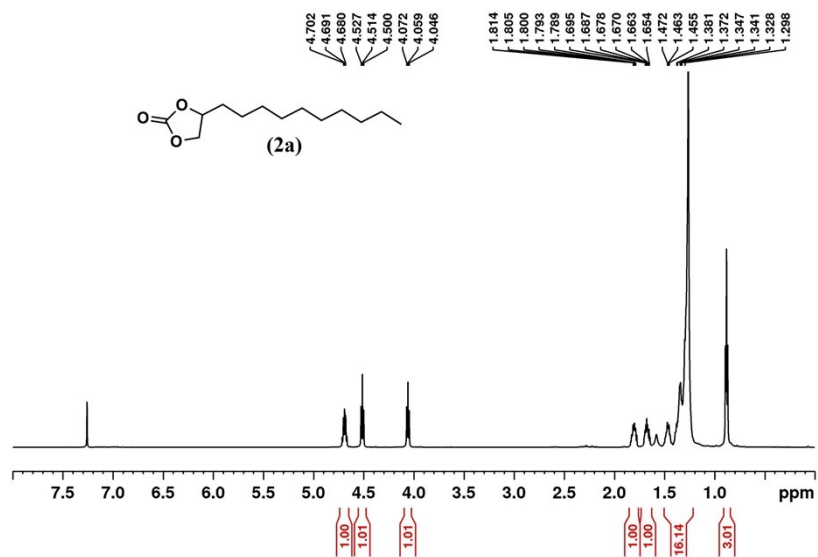

**Fig. S24.** (4-decyl-1,3-dioxolan-2-one) (1):  $^1\text{H}$  NMR ( $\text{CDCl}_3$ , 600 MHz):  $\delta$  4.74 – 4.65 (m, 1H), 4.51 (t,  $J = 8.1$  Hz, 1H), 4.06 (t,  $J = 7.8$  Hz, 1H), 1.81 (ddd,  $J = 14.0, 11.7, 6.3$  Hz, 1H), 1.73 – 1.63 (m, 1H), 1.52 – 1.20 (m, 16H), and 0.88 ppm (t, 3H).

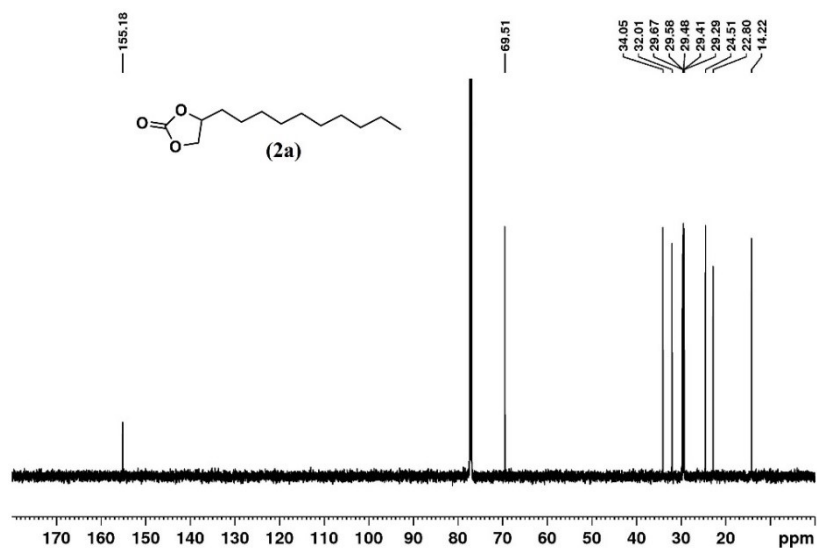

**Fig. S25.**  $^{13}\text{C}$ -NMR spectrum of 4-decyl-1,3-dioxolan-2-one (2a) after purification in  $\text{CDCl}_3$ .

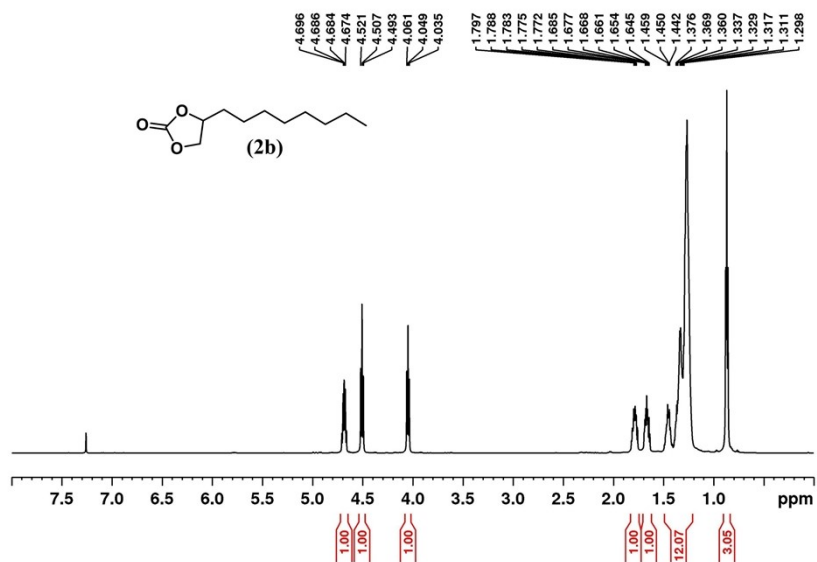

**Fig. S26.** (4-octyl-1,3-dioxolan-2-one) (**2**):  $^1\text{H}$  NMR ( $\text{CDCl}_3$ , 600 MHz):  $\delta$  4.72 – 4.65 (m, 1H), 4.51 (t,  $J = 8.1$  Hz, 1H), 4.05 (t,  $J = 7.8$  Hz, 1H), 1.83 – 1.75 (m, 1H), 1.71 – 1.62 (m, 1H), 1.51 – 1.20 (m, 12H), and 0.87 ppm (t,  $J = 6.9$  Hz, 3H).

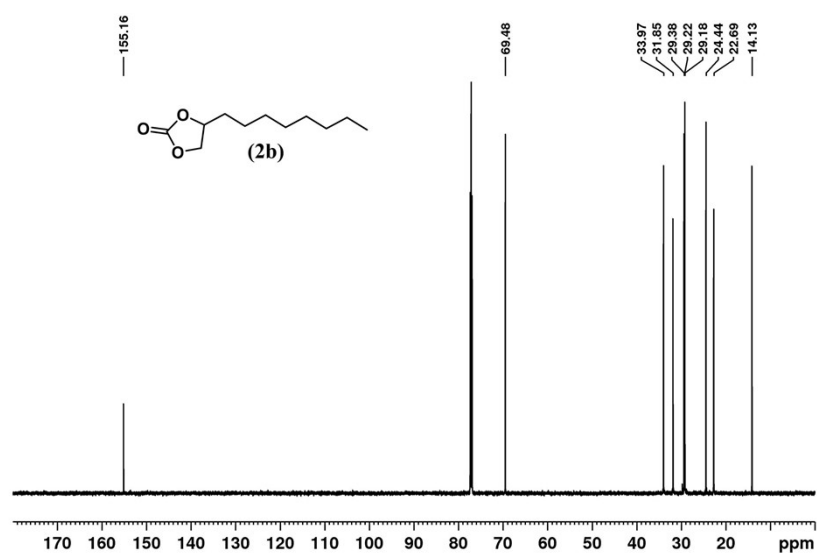

**Fig. S27.**  $^{13}\text{C}$ -NMR spectrum of 4-octyl-1,3-dioxolan-2-one (**2b**) after purification in  $\text{CDCl}_3$ .

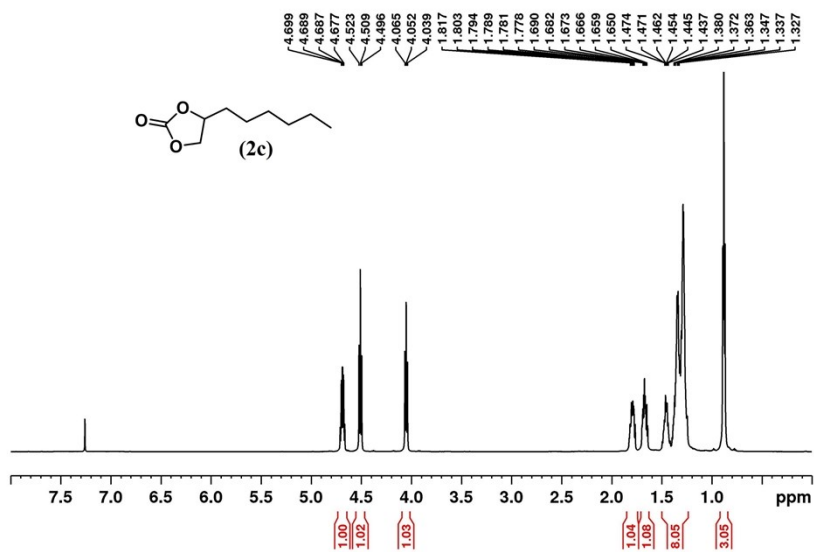

**Fig. S28.** (4-hexyl-1,3-dioxolan-2-one) (**3**):  $^1\text{H}$  NMR ( $\text{CDCl}_3$ , 600 MHz):  $\delta$  4.73 – 4.65 (m, 1H), 4.51 (t,  $J = 8.1$  Hz, 1H), 4.05 (t,  $J = 7.8$  Hz, 1H), 1.84 – 1.75 (m, 1H), 1.72 – 1.63 (m, 1H), 1.51 – 1.23 (m, 8H), and 0.88 ppm (t,  $J = 6.8$  Hz, 3H).

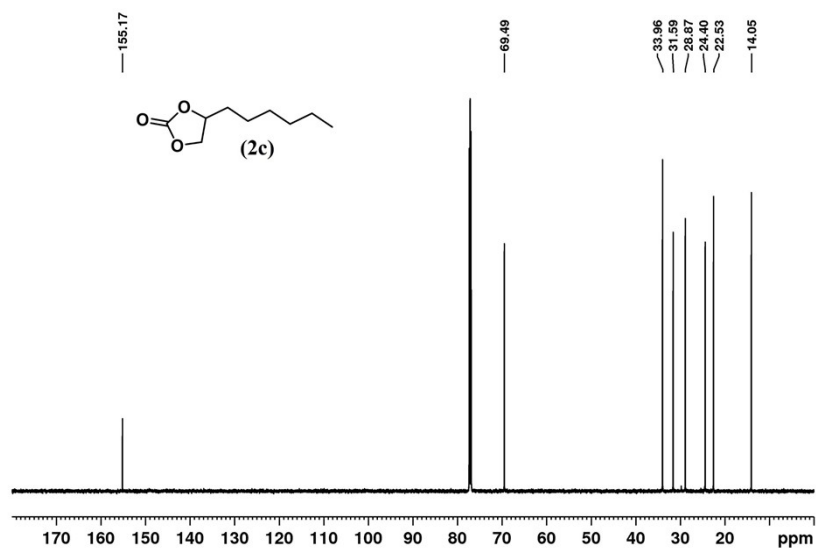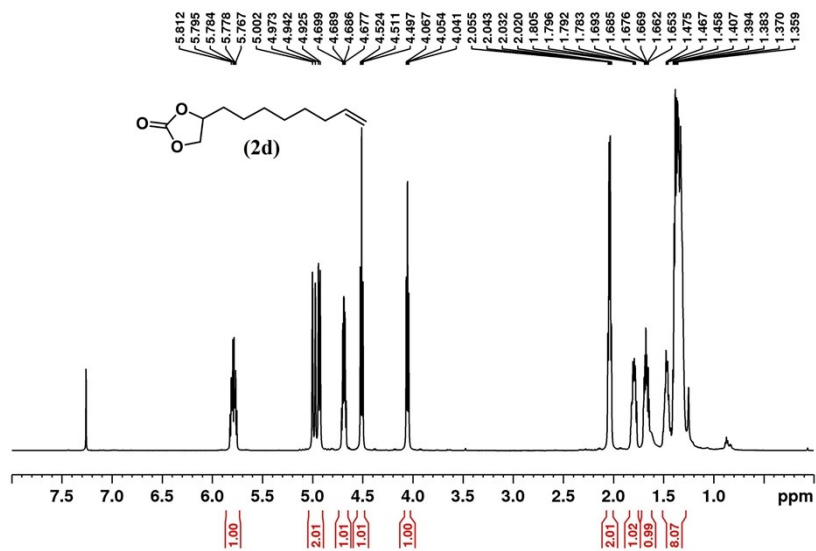

**Fig. S30.** (4-(oct-7-en-1-yl)-1,3-dioxolan-2-one) (**4**):  $^1\text{H}$  NMR ( $\text{CDCl}_3$ , 600 MHz):  $\delta$  5.79 (ddt,  $J = 16.9, 10.1, 6.7$  Hz, 1H), 4.96 (dd,  $J = 32.6, 13.6$  Hz, 2H), 4.74 – 4.64 (m, 1H), 4.51 (t,  $J = 8.1$  Hz, 1H), 4.05 (t,  $J = 7.8$  Hz, 1H), 2.04 (q,  $J = 6.9$  Hz, 2H), 1.85 – 1.75 (m, 1H), 1.67 (ddd,  $J = 19.5, 10.2, 5.0$  Hz, 1H), and 1.53 – 1.27 ppm (m, 8H).

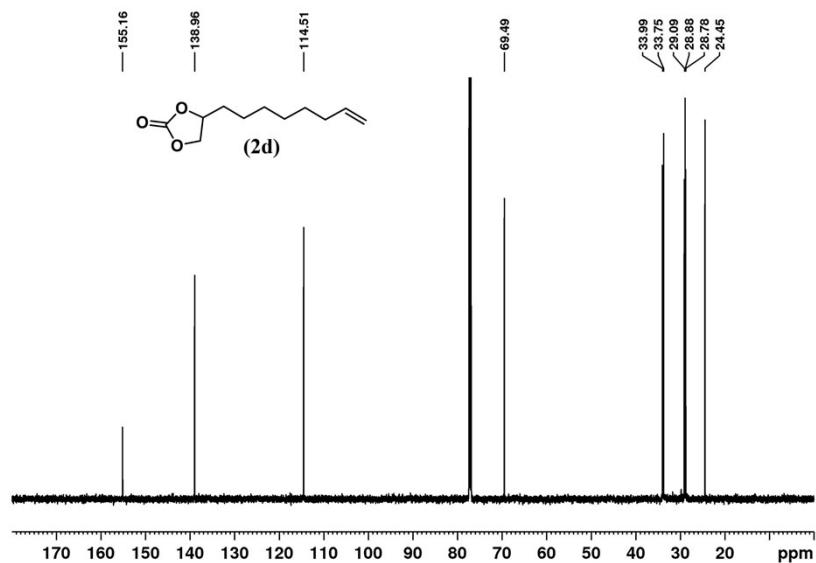

**Fig. S31.**  $^{13}\text{C}$ -NMR spectrum of 4-(oct-7-en-1-yl)-1,3-dioxolan-2-one (**2d**) after purification in  $\text{CDCl}_3$ .

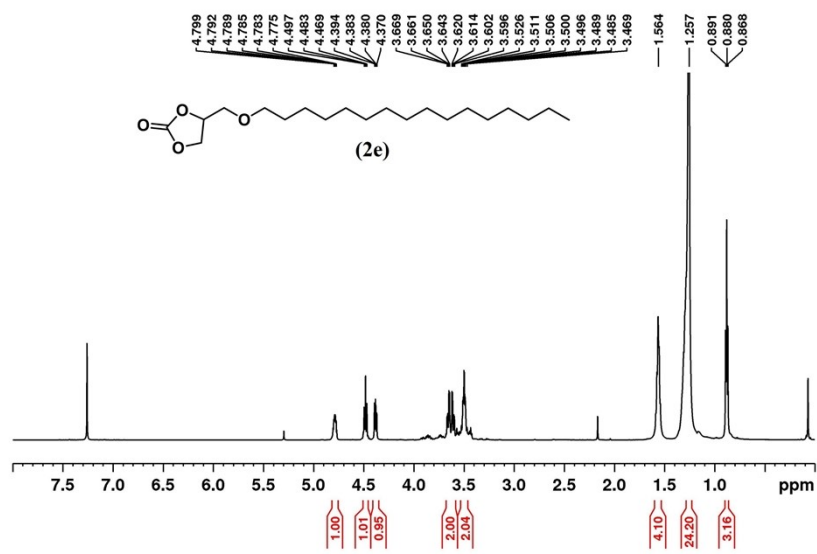

**Fig. S32.** 4-((hexadecyloxy)methyl)-1,3-dioxolan-2-one (**2e**):  $^1\text{H}$  NMR ( $\text{CDCl}_3$ , 600 MHz):  $\delta$  4.79 (ddd,  $J = 10.0, 8.3, 4.1$  Hz, 1H), 4.52 – 4.45 (m, 1H), 4.38 (dd,  $J = 8.2, 6.2$  Hz, 1H), 3.69 – 3.58 (m, 2H), 3.55 – 3.45 (m, 2H), 1.60 – 1.53 (m, 4H), 1.28 – 1.23 (m, 24H), and 0.88 ppm (t,  $J = 6.9$  Hz, 3H).

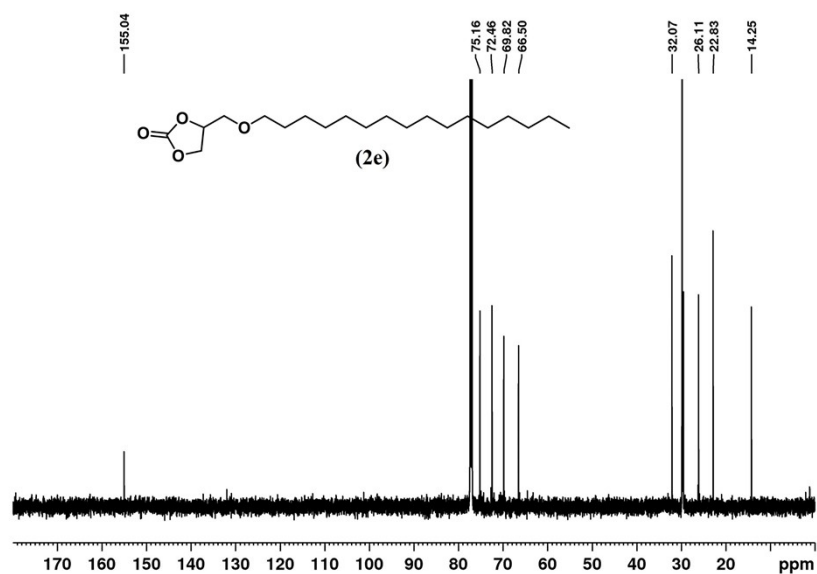

**Fig. S33.**  $^{13}\text{C}$ -NMR spectrum of 4-((hexadecyloxy)methyl)-1,3-dioxolan-2-one (**2e**) after purification in  $\text{CDCl}_3$ .



**Table S2.** Number of phase and hydrodynamic diameters of droplets of the mixtures before and after the reaction. The entries below correspond to the entries shown in Table 1.

| Entry       | Before reaction  |       |       | After reaction   |       |       |
|-------------|------------------|-------|-------|------------------|-------|-------|
|             | Number of phases | $D_h$ |       | Number of phases | $D_h$ |       |
|             |                  | nm    | PDI   |                  | nm    | PDI   |
| 1           | 1                | 566   | 0.162 | 2                | -     | -     |
| 2           | 1                | 566   | 0.162 | 2                | -     | -     |
| 2a (TBAB)   | 1                | 454   | 0.137 | 1                | 772   | 0.382 |
| 2a (TBAC)   | 1                | 483   | 0.124 | 1                | 532   | 0.309 |
| 2b-300 rpm  | 1                | 566   | 0.162 | 2                | -     | -     |
| 2b-1000 rpm | 1                | 566   | 0.162 | 1                | 982   | 0.375 |
| 3           | 1                | 730   | 0.164 | 2                | -     | -     |
| 4           | -                | -     | -     | -                | -     | -     |
| 5           | -                | -     | -     | -                | -     | -     |
| 6           | 2                | -     | -     | 2                | -     | -     |
| 7           | 1                | 592   | 0.144 | 1                | 756   | 0.266 |
| 8           | 1                | -     | -     | 1                | -     | -     |
| 9           | 1                | 286   | 0.091 | 1                | 513   | 0.246 |
| 10          | 1                | 330   | 0.13  | 1                | 516   | 0.214 |
| 11          | 1                | 653   | 0.151 | 2                | -     | -     |
| 12          | 2                | -     | -     | 2                | -     | -     |
| 13          | 1                | >1000 | -     | 2                | -     | -     |
| 14          | 1                | 295   | 0.241 | 1                | 430   | 0.227 |

**Table S3.** Interfacial tension between water and mixture of 1,2-epoxyoctane and 4-hexyl-1,3-dioxolan-2-one corresponding to the compositions of epoxide and cyclic carbonate at different reaction times.

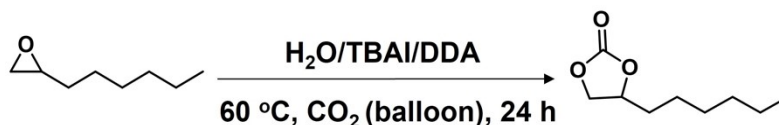

| Time (h) | Conversion (%) | Number of phases | Interfacial tension (mN/m) |
|----------|----------------|------------------|----------------------------|
| 0        | 0              | 1                | 12.3                       |
| 5        | 12             | 1                | 10.4                       |
| 6        | 20             | 2                | 8.5                        |
| 10       | 58             | 2                | 4.1                        |
| 24       | 98             | 2                | 0.8                        |
